# Supplementary material for: Patterns of patient and healthcare provider viewpoints regarding participation in HIV cure-related clinical trials. Findings from a multicentre French survey using Q methodology (ANRS-APSEC)
Source: PLOS journal article supplement (doi:10.1371/journal.pone.0187489), 2017-11-02
Supplement: S3 (10.1371/journal.pone.0187489.s003) [file journal.pone.0187489.s003]

**S2 Table. Idealized Q-sorts for People Living With HIV and HIV Healthcare Provider**

| <b>Summarized statements</b>                                                                        | <b>PLWH-VP1</b><br>Conditional participation | <b>PLWH-VP2</b><br>Most motivated | <b>PLWH-VP3</b><br>Moderately motivated | <b>PLWH-VP4</b><br>Reticent | <b>Nb</b> | <b>HHP-VP1</b><br>Moderately motivated | <b>HHP-VP2</b><br>Most motivated | <b>HHP-VP3</b><br>Benefit-centered | <b>HHP-VP4</b><br>Reticent |
|-----------------------------------------------------------------------------------------------------|----------------------------------------------|-----------------------------------|-----------------------------------------|-----------------------------|-----------|----------------------------------------|----------------------------------|------------------------------------|----------------------------|
| trt-free phase monitoring must be adapted to each patient                                           | 1                                            | 2                                 | 0                                       | 1                           | 1         | -2                                     | 0                                | -4                                 | 1                          |
| trt-free phase follow-up must be regular and closely monitored                                      | 2                                            | 1                                 | -1                                      | 0                           | 2         | 0                                      | 1                                | 2                                  | -3                         |
| I would not participate if the medical follow-up of the trt-free phase were too restrictive         | -2                                           | -4                                | 1                                       | 2                           | 4         | -1                                     | -1                               | -2                                 | 2                          |
| I would refuse to participate if the innovative trt lasted more than 6 months                       | -2                                           | -2                                | -2                                      | -2                          | 5         | -1                                     | -2                               | -2                                 | -4                         |
| I would participate only if the innovative trt were administered on an outpatient basis             | 2                                            | -2                                | -1                                      | 1                           | 6         | -3                                     | 0                                | -1                                 | 3                          |
| I would not participate because of the increased risk of HIV transmission during the trt-free phase | -1                                           | -3                                | -2                                      | -3                          | 7         | 1                                      | -1                               | -1                                 | 2                          |
| I would not participate if adverse effects of the innovative trt were too acute                     | -1                                           | -2                                | 2                                       | 1                           | 8         | 3                                      | 3                                | 0                                  | 4                          |
| I would not participate if the innovative trt affected vital organs                                 | 4                                            | -1                                | 4                                       | 0                           | 9         | 4                                      | 0                                | 1                                  | 1                          |
| The innovative trt must not entail irreversible adverse effects                                     | 3                                            | 0                                 | 4                                       | 1                           | 10        | 4                                      | -1                               | 4                                  | 3                          |
| I would not participate if adverse effects lasted more than 5 days after the innovative trt         | -1                                           | -1                                | 0                                       | -3                          | 11        | 1                                      | -2                               | -2                                 | -2                         |

|                                                                                                   |    |    |    |    |    |    |    |    |    |
|---------------------------------------------------------------------------------------------------|----|----|----|----|----|----|----|----|----|
| It is fundamental that my lifestyle does not change                                               | 1  | -3 | 1  | 2  | 12 | 0  | 1  | -3 | 3  |
| It is fundamental that my current physician for HIV would supervise the three phases of the trial | 0  | 2  | 0  | 2  | 3  | 2  | -1 | 1  | 0  |
| <i>It is fundamental that my current physician for HIV would believe in the trial</i>             | 4  | 3  | 2  | 3  | 13 | 2  | 2  | 2  | 2  |
| A medical contact must always be available by phone                                               | 0  | 1  | -1 | -1 | 14 | 1  | 0  | 1  | -1 |
| I don't believe in this type of trial.                                                            | -4 | -4 | -4 | -1 | 15 | -3 | -4 | -3 | -1 |
| I believe that participating in a clinical trial guarantees better care                           | -2 | 1  | 0  | 0  | 17 | 0  | -1 | -1 | -1 |
| I think that it would be better to invest in access to ART for everyone                           | 0  | 0  | -4 | 0  | 18 | -2 | -3 | 2  | 0  |
| I think that it would be better to invest in prevention                                           | -1 | -2 | -3 | 2  | 19 | -1 | -4 | 0  | -2 |
| Financial compensation could entice me to participate                                             | -3 | -1 | -2 | -4 | 20 | 0  | 0  | 0  | -4 |
| I would participate in this trial even if the trt-free phase did not last more than 6 months      | 0  | 2  | 1  | 1  | 21 | 1  | 2  | -3 | 0  |
| <i>It is important to participate in HIV research</i>                                             | 3  | 4  | 3  | 3  | 22 | 1  | 3  | 3  | 1  |
| It is important that medical advances for future generations be made possible                     | 2  | 3  | 3  | 4  | 23 | 2  | 1  | 2  | 4  |
| One motivation for participation is that one could forget about the disease                       | 2  | 0  | -3 | -4 | 24 | -2 | 1  | -1 | -1 |
| Proposing a clinical (research) trial with no direct benefit for the patient has no sense         | 1  | -1 | -3 | -2 | 25 | -3 | -2 | 4  | 2  |

|                                                                                           |    |    |    |    |    |    |    |    |    |
|-------------------------------------------------------------------------------------------|----|----|----|----|----|----|----|----|----|
| Participating in this trial could be a way to avoid the long-term consequences of ART     | 0  | 4  | 3  | 0  | 26 | 2  | 3  | 3  | -1 |
| There is too much uncertainty about the adverse effects for me to participate             | -3 | -3 | 1  | -2 | 16 | -2 | 2  | 1  | 0  |
| Having regular feedback from participating patients would motivate me                     | 1  | 1  | 1  | -1 | 27 | -1 | 2  | 0  | 1  |
| Regular information by physicians about the trial's results would motivate me             | 1  | 2  | 2  | 3  | 28 | 0  | 4  | 1  | 0  |
| It is necessary that I have clear information about the trt.                              | 3  | 3  | -1 | 4  | 29 | 3  | 4  | 3  | 1  |
| This trial is more suitable for people diagnosed more than ten years ago.                 | -4 | 0  | -1 | -1 | 30 | -4 | 1  | -2 | -3 |
| This trial should focus on those who have participated in only a few trials before        | -2 | 0  | -2 | -1 | 31 | -4 | -3 | -4 | -2 |
| This trial is more suitable for people who find it difficult to take ART on a daily basis | -3 | -1 | 2  | -2 | 32 | 3  | -3 | -1 | -2 |
| This trial is more suitable for people who do not work                                    | -1 | 1  | 0  | -3 | 33 | -1 | -2 | 0  | -3 |

Trt= treatment
